# Supplementary material
Source: Springer Nature journal article supplement (https://www.springermedizin.de/resource/supplementary/12913_2013_2684_MOESM2_ESM.pdf/9531122)

**Department activities**

**Audit process**

**Audit team activities**

**Schedule**

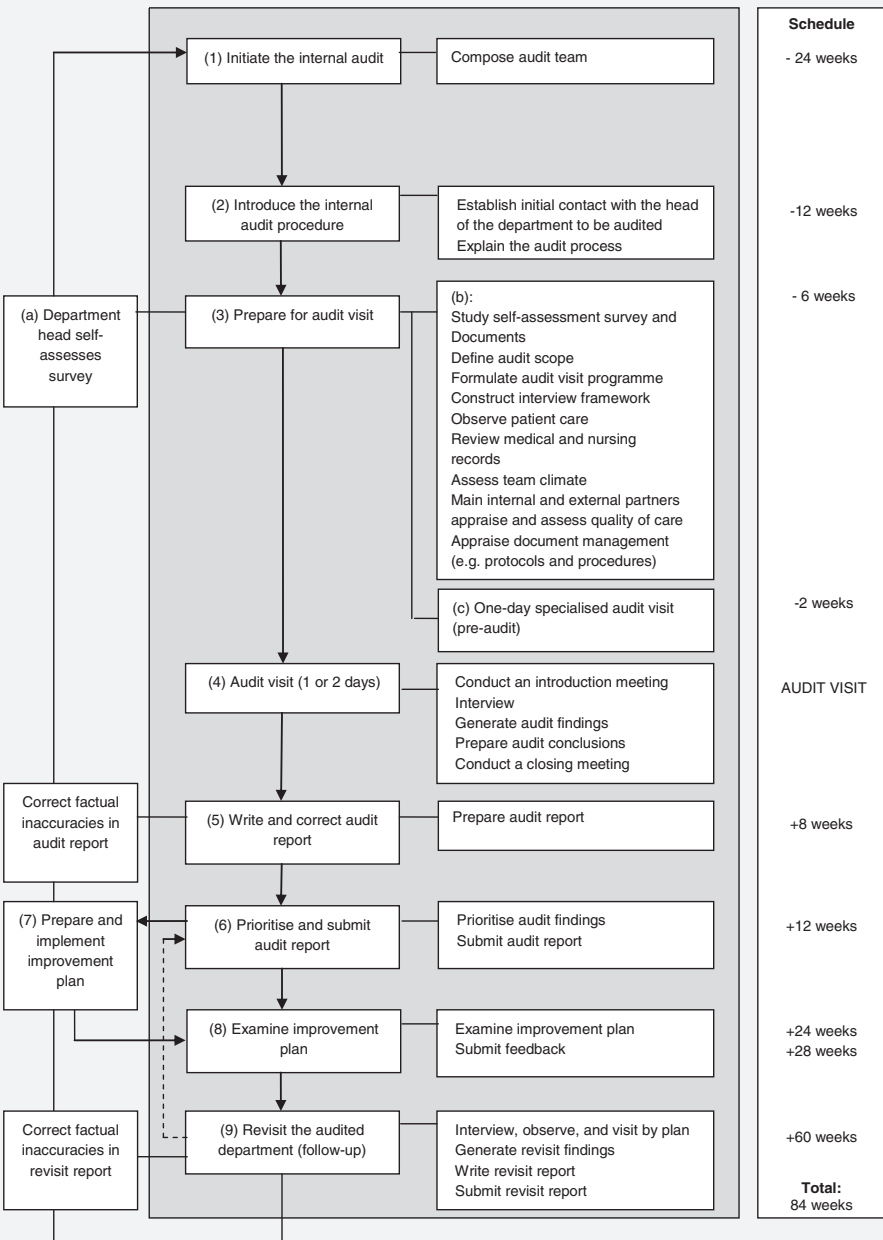

Supplement: MOESM2 [file 9531122]
